# Supplementary material for: Headway in rhodanide anion based ternary gel polymer electrolytes (TILGPEs) for applications in rechargeable lithium ion batteries: an efficient route to achieve high electrochemical and cycling performances
Source: Royal Society of Chemistry journal article supplement (doi:10.1039/c7ra01081h), 2017-01-01
Supplement: c7ra01081h1.pdf [file c7ra01081h1.pdf]

### Supplementary Information

**Headway in rhodanide anion based ternary gel polymer electrolytes (TILGPEs) for applications in rechargeable lithium ion batteries: An efficient route to achieve high electrochemical and cycling performances**

**Photographic image of prepared gel polymer electrolyte (TILGPE3)**

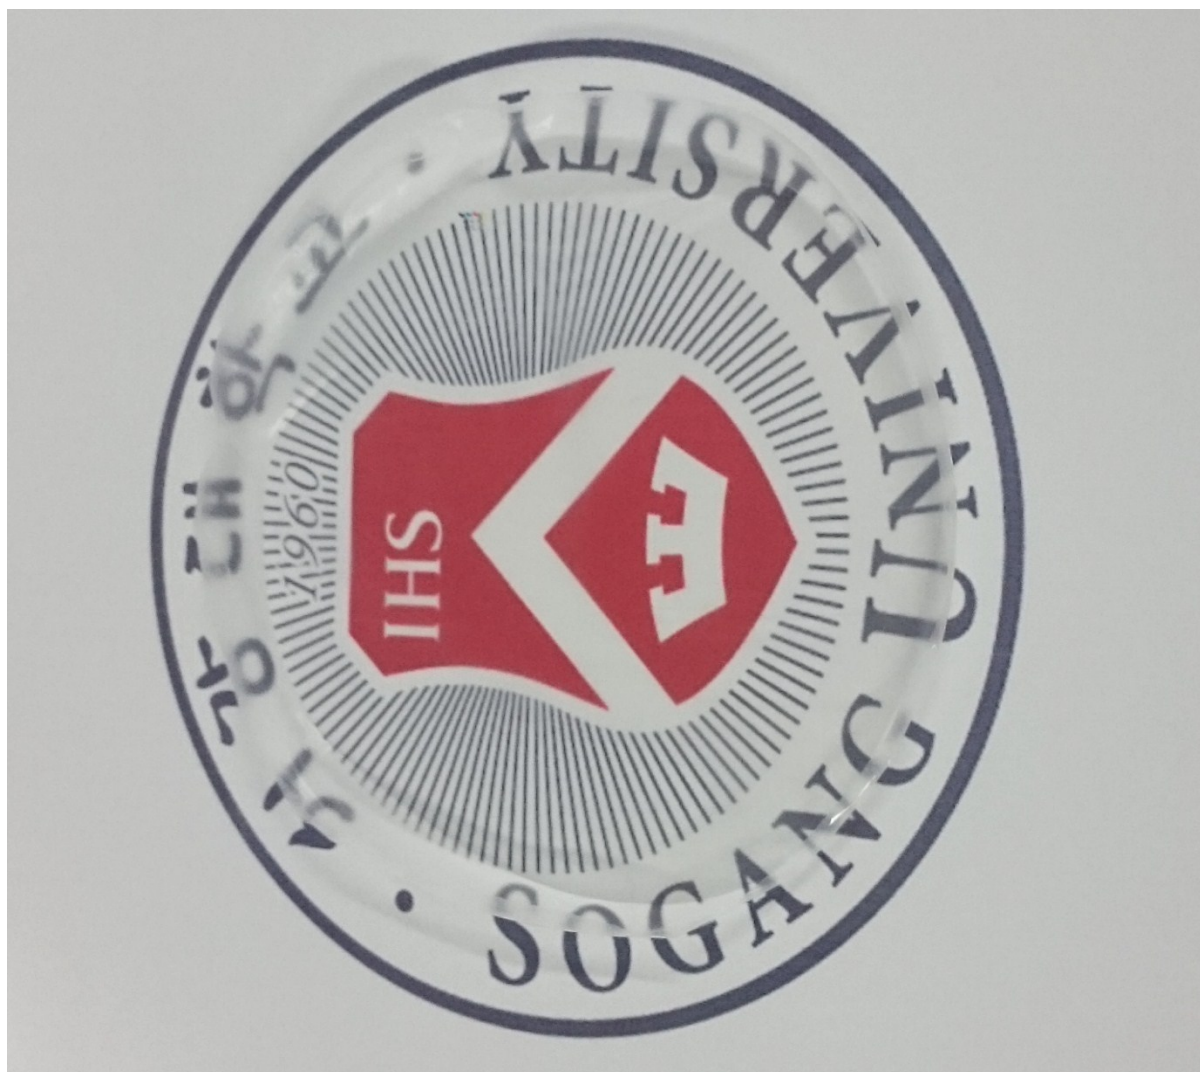

Figure S1: Photographic image of prepared gel polymer electrolyte (TILGPE3)

## DSC analysis

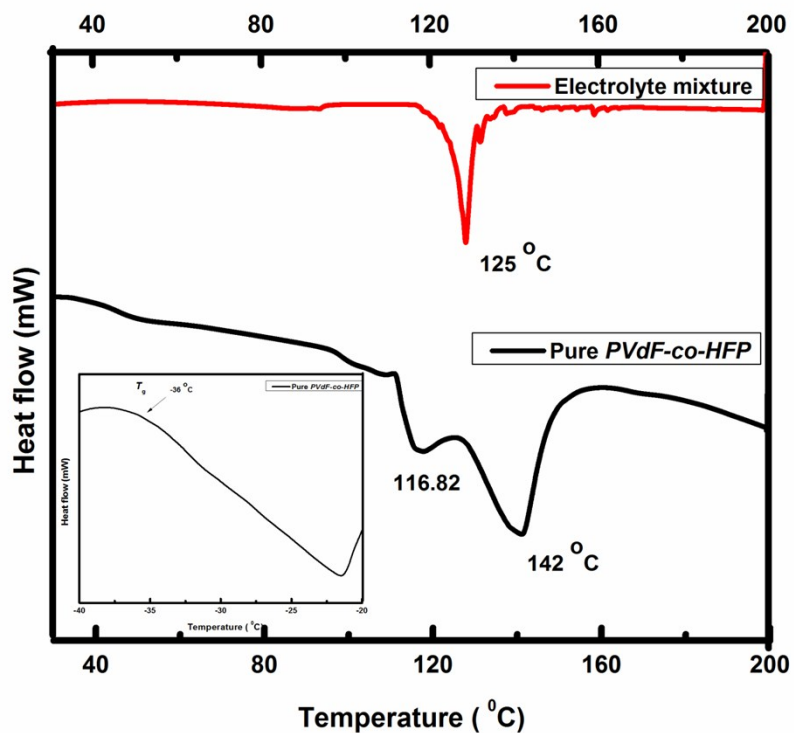

Figure S2: DSC thermogram of pristine *PVdF-co-HFP* and electrolyte mixture

## TGA analysis

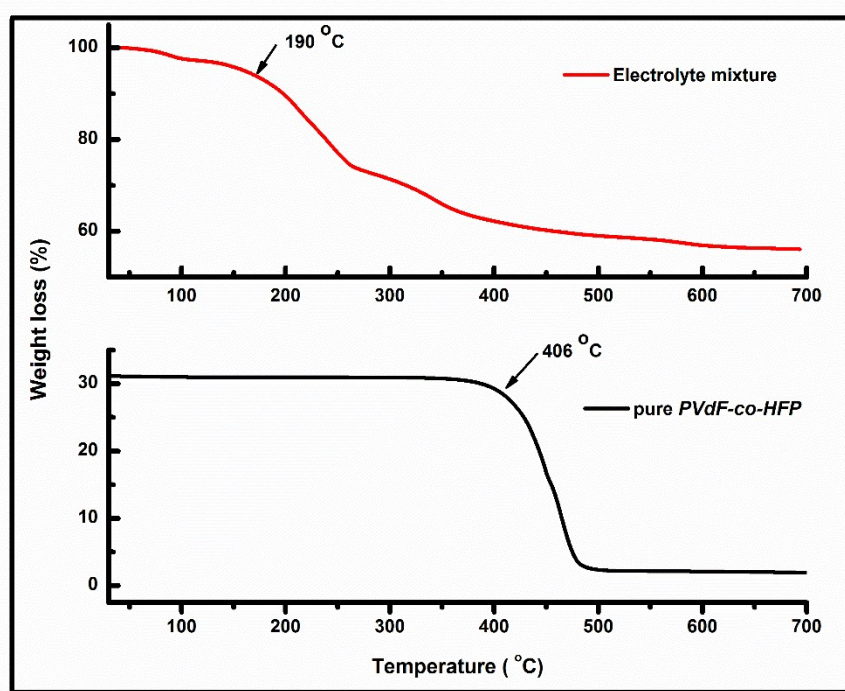

Figure S3: TGA thermogram of pristine *PVdF-co-HFP* and electrolyte mixture

## FT-IR analysis

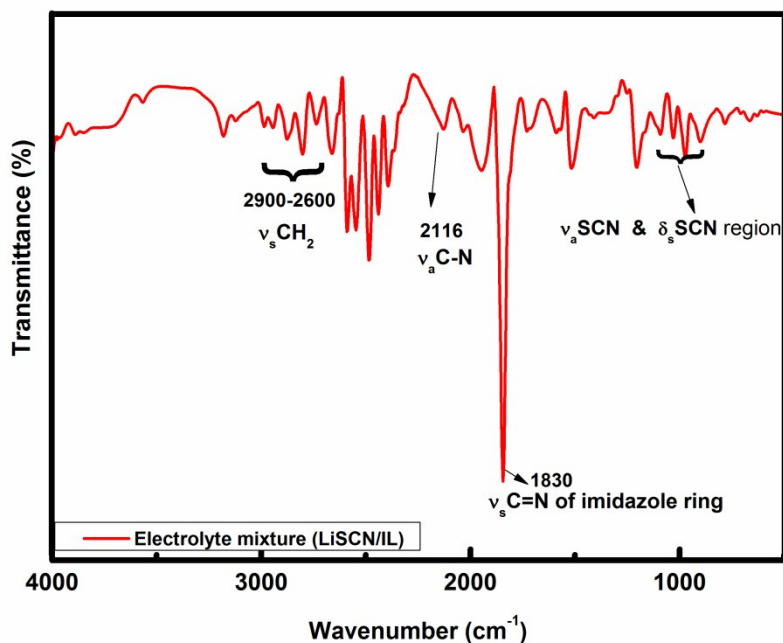

Figure S4: FT-IR spectrum of electrolyte mixture

**Charge-discharge analysis of Li/ (1M  $\text{LiPF}_6$  in 50%:50% EC/PC)/ $\text{LiFePO}_4$  (using Celgard 2300 as separator)**

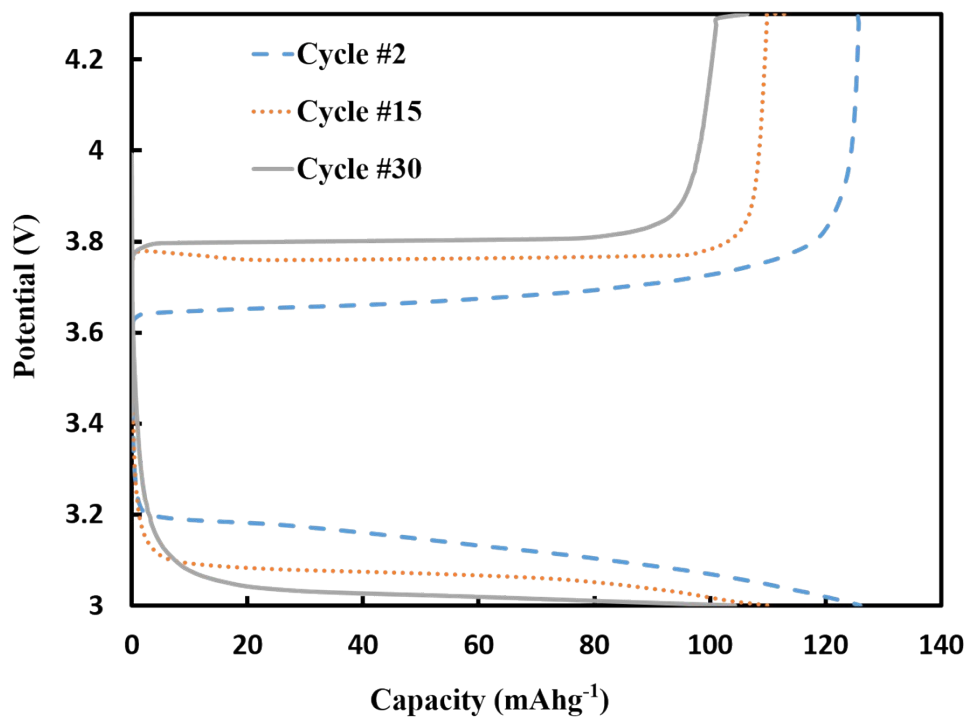

Figure S5: Charge discharge profile of conventional liquid electrolyte 1M  $\text{LiPF}_6$  in EC/PC

(50%:50%)

### Capacity retention curve

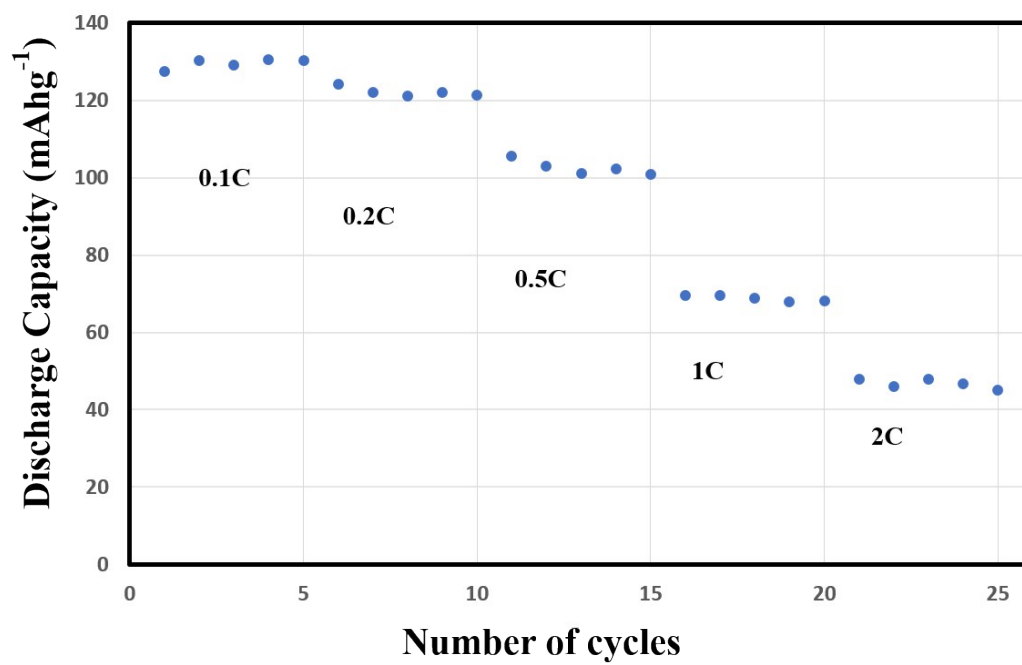

**Figure S6:** Capacity retention curve of 1M LiPF<sub>6</sub> in EC/PC (50%:50%)
